# Supplementary material
Source: Royal Society of Chemistry journal article supplement (doi:10.1039/d6ee00488a)
Supplement: d6ee00488a1.pdf [file d6ee00488a1.pdf]

## Supporting Information

# Challenging Conventional Assumptions in PV: A High-Throughput Open-Air Approach to Low-Cost Perovskite Module Production

Austin C. Flick and Reinhold H. Dauskardt\*

### Device Fabrication Experimental References

*Conventional Perovskite Module Fabrication:* sputtered ITO substrates reference the performance and thickness of  $10 \Omega \text{ sq}^{-1}$  commercially available ITO from Xin Yan Technology, Ltd. Poly(triaryl amine) (PTAA) films for the HTL were based on the procedures by Ouyang *et al.*, Küffner *et al.*, Wu *e al.*, and Fei *et al.*<sup>[1]–[5]</sup> Perovskite deposition followed blade-coating recipes adapted from Ouyang *et al.*, Küffner *et al.*, Wu *e al.*, and Fei *et al.*<sup>[2]–[5]</sup> Electron transport layers consisting of a 40 nm layer of C<sub>60</sub> followed by a 7.5 nm layer of bathocuproine deposited by thermal evaporation followed the recipes outlined in Scheideler *et al.*<sup>[6]</sup>, Rolston *et al.*<sup>[7]</sup>, and Flick *et al.*<sup>[8]</sup> A 150 nm thick Ag metal electrode deposited by thermal evaporation references the recipes in Scheideler *et al.*, Rolston *et al.*, and Flick *et al.* For module integration, P1, P2, and P3 scribes are based on the average direct ablative scribes outlined in Flick *et al.*<sup>[8]</sup>

*Open-Air Spray-Deposited Perovskite Module Fabrication:* The front ITO electrode utilizes spray-deposited and combustion oxidation with rapid plasma (CORP) chemistry employing an Impact ultrasonic spray system (Sonotek) to deposit the CORP precursor solution followed by a N<sub>2</sub> blown-arc discharge with an Ar-forming gas shrouded plasma cure (Plasmatreat). The NiO<sub>x</sub> HTL references the ultrasonic spray deposition recipe in Scheideler *et al.* The perovskite layer references the rapid spray plasma process (RSPP) developed in Hilt *et al.*<sup>[9]</sup> The ETL bilayer utilizes spray-deposition with an identical Impact ultrasonic spray system and annealed with a near infrared rapid thermal processing (NIR-RTP) unit (Adphos). Lastly, the rear electrode utilizes spray-deposition with an Impact spray system and silver nanowires (Asahi Singapore).

*Optoelectronic Characterization:* The open-air manufactured perovskite devices modeled were measured in ambient conditions ( $\approx 45\%$  RH, 25 °C) under 1 sun, AM 1.5G illumination from a 300 W xenon lamp (Oriol PV) solar simulator. The lamp intensity was calibrated based on an NREL-calibrated KG5 filtered Si reference cell. *J–V* curves were collected with a Keithley Model

2400 digital multimeter measured between  $-0.1$  and  $1.4$  V for the control devices with an increment of  $0.01$  V and a delay of  $0.1$  s between points. For the spin-coated modules, the voltage ranged from  $-0.1$  and  $4.8$  V with an increment of  $0.04$  V and a delay of  $0.1$  s between points. For the RSPP modules, the voltage ranged from  $-0.1$  and  $20$  V with an increment of  $0.2$  V and a delay of  $0.1$  s between points.

### Equipment Costs

Equipment costs include quoted prices modified by tool depreciation and 7% taxes, shipping, and tariffs ( $r_{tst}$ ). A conservative equipment scaling factor of  $0.9$  is employed to account for GW-scale manufacturing where the amount of equipment far exceeds the original quoted volume. Facilitation (electrical connections, waste, etc.) is fixed at  $\$50k$  for each process. Commissioning and training for each process is fixed at  $\$50k$ .

$$Depreciation \text{ (years)} = \frac{5}{\left(\frac{Runtime_{tool}}{Runtime_{factory}}\right)^n}, \quad 0 < n < 1 \quad (\text{Equation S1})$$

$$Equipment \text{ Cost} = \frac{Cost_{quote}}{Depreciation} \times (1 + r_{tst}) \quad (\text{Equation S2})$$

The depreciation discount factor  $n$  modifies the tool depreciation by the relative runtime of each tool to account for large variations in processing throughputs. The average open-air spray process throughput is  $87$  mod/hr, resulting in an average spray process uptime of  $36\%$ . The average vacuum-based process (e.g., sputter, thermal evaporation) throughput is  $25$  mod/hr, resulting in an average process uptime of  $90\%$ . A depreciation discount factor,  $n$ , of  $0.5$  results in a minimum depreciation period of  $5$  years (sputtered ITO,  $11$  mod/hr throughput) and a maximum depreciation period of  $15$  years (RSPP perovskite,  $306$  mod/hr throughput).

$$\text{Number of tools per process, } i: \quad N_{tools,i} = \frac{N_{mod/year}}{\frac{N_{mod}}{tool/year}}, \text{ round up} \quad (\text{Equation S3})$$

$$\text{Annual number of modules per process, } i: \quad \frac{N_{mod}}{year,i} = \frac{v_i}{L_{mod}} \times t_{on/year,i} \quad (\text{Equation S4})$$

For process  $i$ , throughput  $v_i$ , module processing length  $L_{mod}$ , and factory runtime per year  $t_{on/year}$ .

### Facilities

Facilities floor space per processing station is assumed as 50 m<sup>2</sup> for the equipment and walkways, 50 m<sup>2</sup> for module handling and logistics, and 25 m<sup>2</sup> for office and maintenance staff.

### Production Yield

Factory yield losses are assumed globally as 5%. Individual yields per process were not considered.

### Labor

Wages are provided from the 2022 California Bureau of Labor Statistics. Additional compensation and benefits is assumed as 35% on top of the baseline wages. The model assumes 1 direct operator per shift per tool and 0.25 first-line supervisors per shift per tool.

### Maintenance

Maintenance costs per tool are assumed as 4% of the initial capital investment. Individually catered maintenance costs were not calculated based on the specific process. Maintenance personnel are assumed as 2 people per shift per tool across 4 shifts per week during 6 weeks per year.

### Utilities

$$C_{util,i} = E_{elec,i} \times C_{elec} \quad (\text{Equation S5})$$

$$E_{elec,i} = P_{elec/nozzle,i} \times N_{nozzles,i} \times t_{on/year,i} \quad (\text{Equation S6})$$

$$t_{on/year,i} = t_i \times N_{mod/year} \quad (\text{Equation S7})$$

For electricity costs  $C$  per process  $i$ , the electricity required per process  $E_{elec,i}$ , and the power used by each individual component or nozzle  $P$ , and the number of components or nozzles  $N$ .

### Materials Costs

#### Salts and Solvents

$$\text{Materials Cost per material, } j: C_{mat,j,per\ unit} = \left\{ \frac{\$}{g} \right\}_j \times X_j \quad (\text{Equation S8})$$

$$\text{Scaling Multiplier: } X_j = \left( \frac{V_{prod,j} / f_{shipment}}{V_{quote,j}} \right)^{(\alpha_i - 1)} \quad (\text{Equation S9})$$

$$\text{Production Volume: } V_{prod,j} = N_{mod/year} \times c_j \times LD_j \quad (\text{Equation S10})$$

$$\text{Liquid Dose: } LD_j = (FR_{sol,j} \times N_{nozzles,parallel,j} \times t_j) \left( \frac{1}{UF_j} \right) \quad (\text{Equation S11})$$

Number of Parallel Nozzles: 
$$N_{nozzles,parallel,j} = \left( \frac{W_{mod}}{W_{nozzle,j}} \right) + N_{nozzles,excess,j} \quad (\text{Equation S12})$$

Processing Time per process,  $i$ : 
$$t_i = \frac{N_{passes} \times L_{mod}}{v_i} \quad (\text{Equation S13})$$

Materials Costs per material:

$$C_{mat,j,per\ year} = C_{mat,j,per\ unit} \times c_i \times LD_j \times N_{mod/year} \times (1 + r_{taxes}) \quad (\text{Equation S14})$$

Materials Costs per step  $i$  and material  $j$ : 
$$C_{i,per\ year} = \sum_j C_{j,per\ year} \quad (\text{Equation S15})$$

For materials shipment frequency  $f$ , concentration  $c$ , flow rate  $FR$ , and utilization factor  $UF$  to account for wasted processing materials.

### Process Gases

Gas Demand: 
$$GD_j = (FR_{gas,j} \times N_{nozzles,parallel,j} \times t_j) \left( \frac{1}{UF_j} \right) \quad (\text{Equation S16})$$

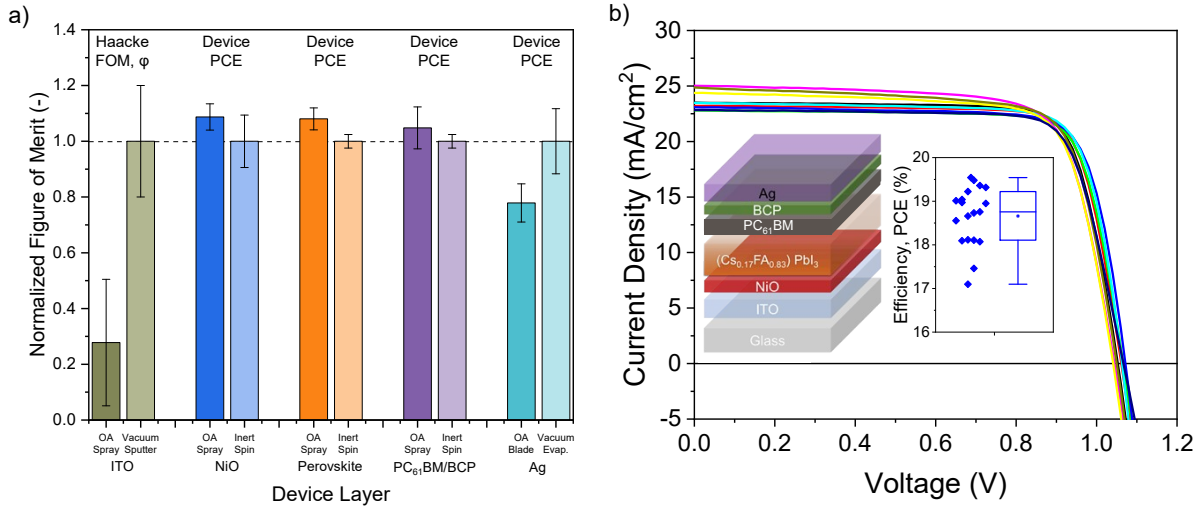

**Figure S1:** a) Figure of Merit (FOM) performance of modeled open-air perovskite device fabrication techniques against conventional fabrication alternatives for identical materials. OA refers to open-air deposition, Vacuum refers to deposition at  $\sim 1\text{E-}6$  torr, and Inert refers to deposition in an  $\text{N}_2$  glovebox. Spray refers to ultrasonic spray coating, Sputter refers to magnetron sputter deposition, Spin refers to spin-coating, Blade refers to blade-coating, and Evap. refers to thermal evaporation. b) Reference open-air manufactured perovskite device performances used in the module design calculations.

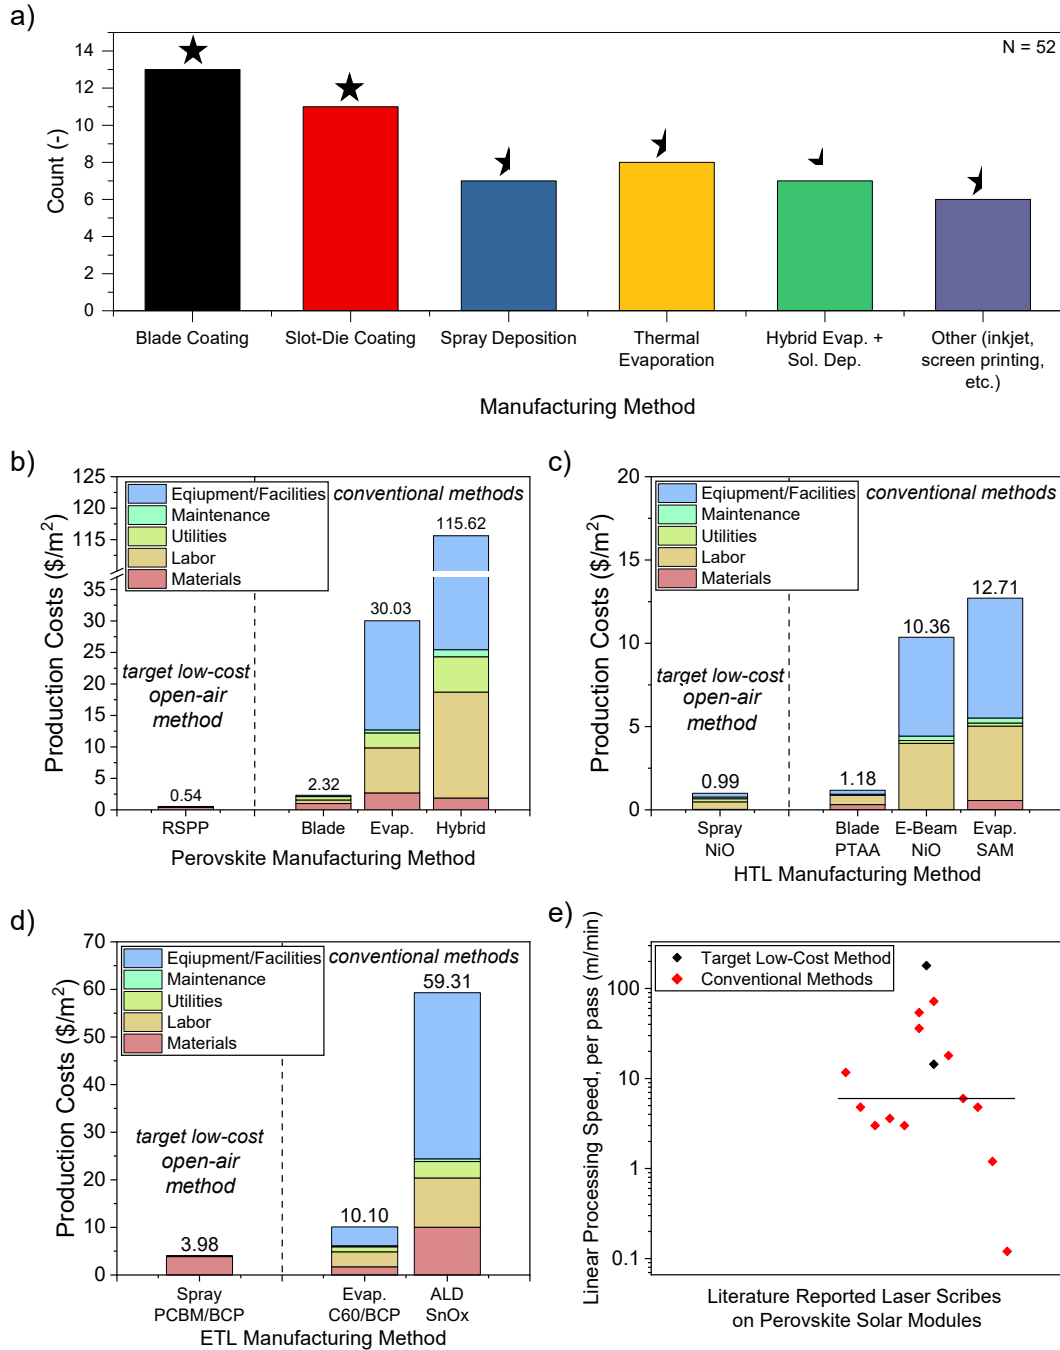

**Figure S2:** a) Recent publication relevance of popular perovskite manufacturing methods selected based on Google Search ranking. Stars indicate module/large-area emphasis for each method: Full star = strong module representation; half star = mix of devices and mini-modules, quarter star = few dedicated module papers. b-e) Down selection analysis for the b) perovskite, c) HTL, and d) ETL layers, alongside e) the laser scribing mechanisms. Horizontal line in (e) represents the global median.

**Figure S2** references for Blade Coating<sup>[S10]–[S22]</sup>, Slot-Die Coating<sup>[S23]–[S33]</sup>, Spray Deposition<sup>[S34]–[S40]</sup>, Thermal Evaporation<sup>[S41]–[S48]</sup>, Hybrid Evaporation + Solution Deposition<sup>[S31][S44][S49]–[S53]</sup>, and Other<sup>[S54]–[S59]</sup>

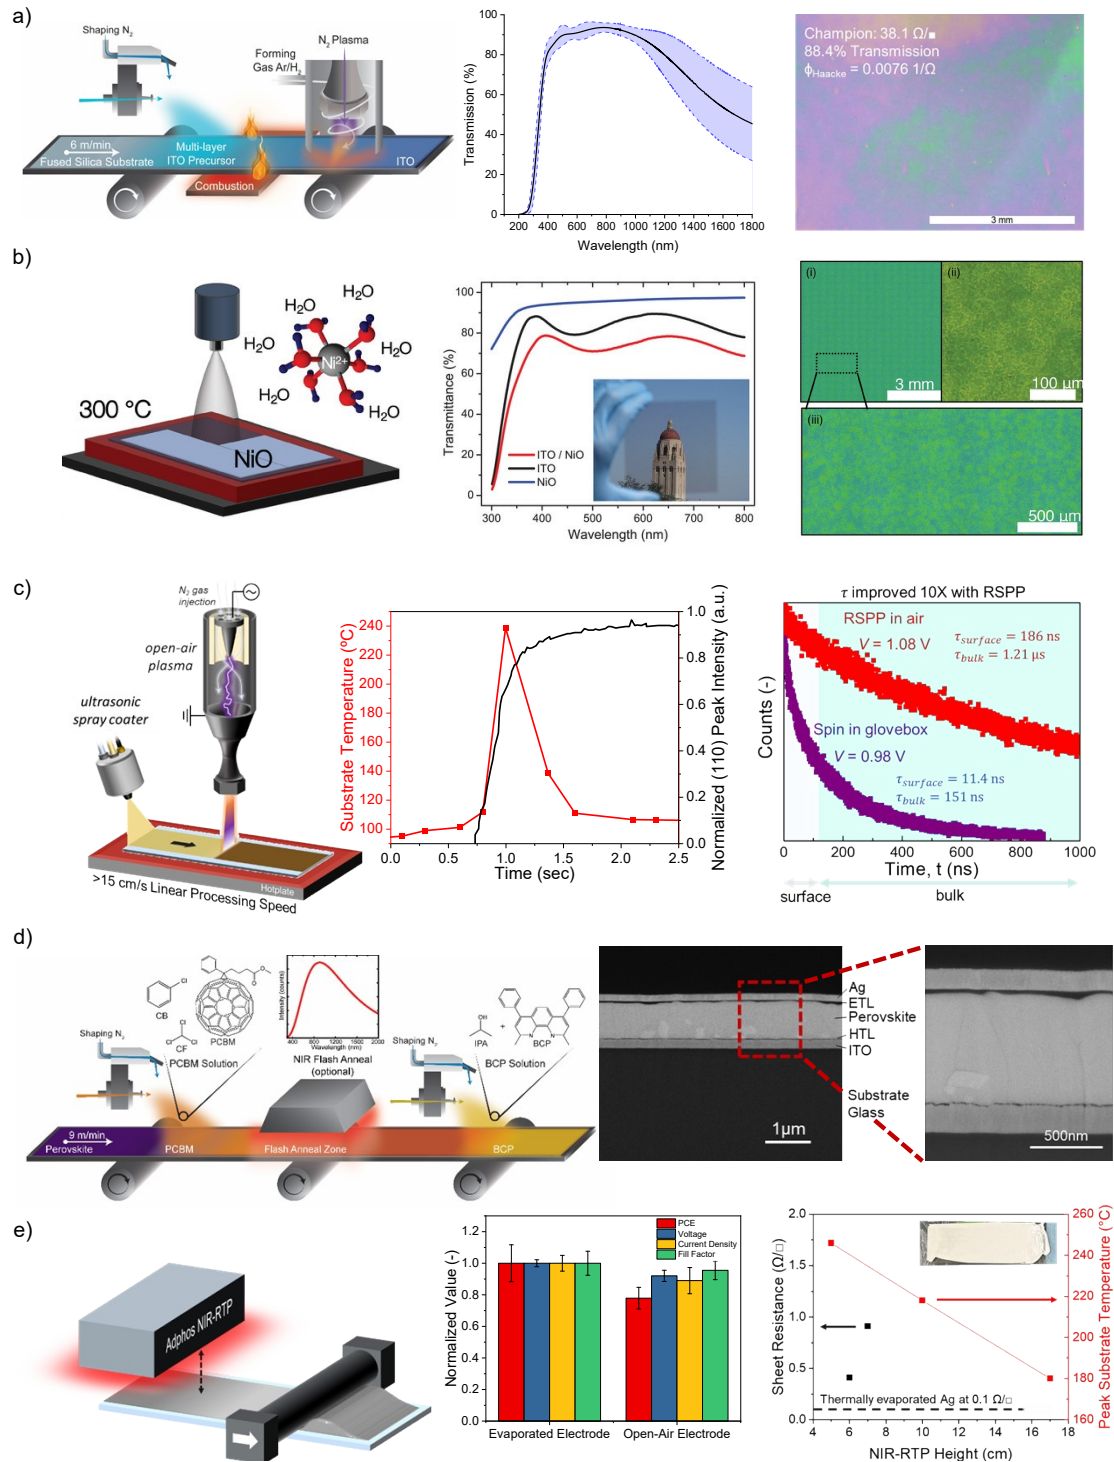

**Figure S3:** a) Combustion Oxidation with Rapid Plasma (CORP) processing of ITO front electrodes with >85% transmittance and Haacke Figure of Merit (FOM) above 0.005 1/Ω. b) Aqueous spray pyrolysis of NiO hole transport layers with considerable transparency and high uniformity across 100 cm<sup>2</sup>. c) Rapid Spray Plasma Processing (RSPP) of perovskite absorber films with ultrafast <1 sec curing and elevated carrier lifetimes. d) Ultra-thin spray deposition with Near Infrared Rapid Thermal Processing (NIR-RTP) for PC<sub>61</sub>BM/BCP electron transport bilayers demonstrating planarizing effect on underlying film roughness seen in backscatter SEM of polished cross sections. e) Blade coating with NIR-RTP for Ag rear electrodes with >90% maintained fill factor and low sheet resistance approaching that of thermally evaporated films.

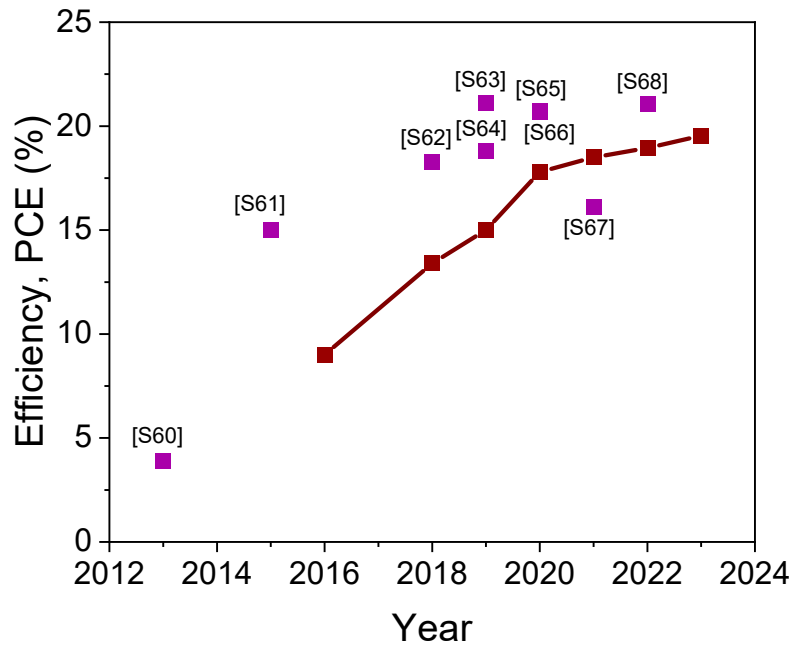

**Figure S4:** Record inverted p-i-n perovskite device performances since 2013 using conventional deposition methods (purple) and open-air techniques (red) without additional additives or interlayers within or between the p, i, and n materials.

**Table S1:** CapEx and throughputs for each analyzed thin-film fabrication technique.

| Processing Technique (Open-Air)     | Throughput (mod/hr) | Parallel Processing Stations* (#) | Cost per Tool   | Cost per Station (Millions of Dollars) | References    |
|-------------------------------------|---------------------|-----------------------------------|-----------------|----------------------------------------|---------------|
| Ultrasonic Spray                    | 180 – 306           | 1 – 4                             | \$ 317,835.00   | \$ 0.32 – 1.28                         | [S6][S7][S69] |
| Atmospheric Pressure Plasma         | 306                 | 1                                 | \$ 750,000.00   | \$ 0.75                                | [S7]          |
| Shrouded Plasma                     | 11                  | 3                                 | \$ 2,304,000.00 | \$ 6.91                                |               |
| NIR-RTP                             | 270                 | 1                                 | \$ 200,000.00   | \$ 0.20                                |               |
| Hotplate Anneal                     | 12                  | 3                                 | \$ 20,000.00    | \$ 0.06                                | [S6]          |
| Laser Liftoff                       | 72 – 180            | 1                                 | \$ 1,000,000.00 | \$ 1.00                                | [S8]          |
| Processing Technique (Conventional) | Throughput (mod/hr) | Parallel Processing Stations* (#) | Cost per Tool   | Cots per Station (Millions of Dollars) | References    |
| Sputter                             | 18                  | 2                                 | \$ 5,884,425.00 | \$ 11.77                               | [S7]          |
| Blade Coater                        | 36                  | 1                                 | \$ 128,953.62   | \$ 0.13                                | [S1] – [S5]   |
| Thermal Evaporation                 | 9 – 11              | 3 – 4                             | \$ 1,000,000.00 | \$ 3.00 – 4.00                         | [S7]          |
| Hotplate Anneal                     | 12                  | 3                                 | \$ 20,000.00    | \$ 0.06                                | [S6]          |
| Laser Ablation                      | 7 – 17              | 2 – 5                             | \$ 1,804,304.00 | \$ 3.61 – 9.02                         | [S8]          |

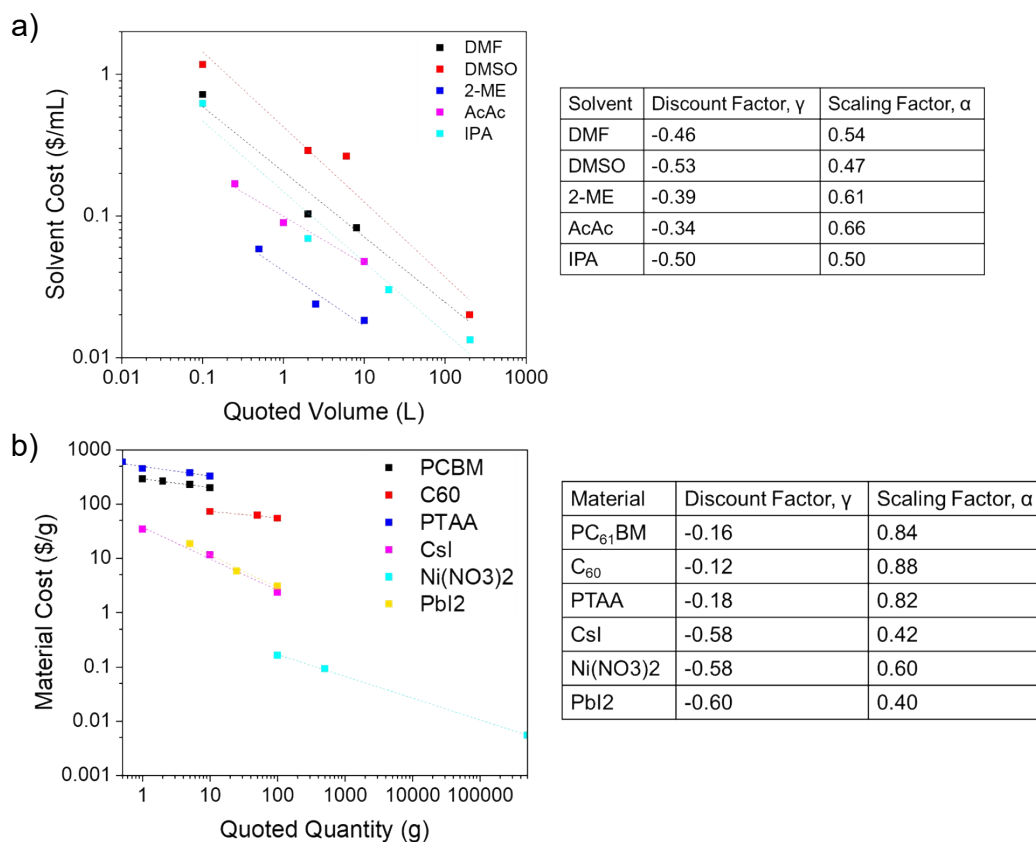

**Figure S5:** Materials scaling factors for a) processing solvents, and b) metal salts and organic molecules.

**Table S2:** Comparison in module scribing techniques and methods.

| Scribe Method                                      | Ref   | Authors                     | Year | Journal            | Speed (m/min) | Laser Source (Wavelength (nm))        |
|----------------------------------------------------|-------|-----------------------------|------|--------------------|---------------|---------------------------------------|
| <b>Conventional Direct Ablation Laser Scribing</b> | [S70] | G. Mincuzzi...T. Brown      | 2015 | ChemElectroChem    | 0.12          | Nd:YAG (355, 1064), YAG (515)         |
|                                                    | [S71] | H. Chen...L. Han            | 2017 | Nature             | 1.2-4.8       | (1064, 532)                           |
|                                                    | [S72] | E. Bi...L. Han              | 2019 | Joule              | 3-6           | (532, 1064)                           |
|                                                    | [S73] | F. Giacomo...A. Di Carlo    | 2020 | Micromachines      | 11.7          | (355)                                 |
|                                                    | [S74] | A. Palma...A. Di Carlo      | 2017 | IEEE J. Photovolt. | 18            | Nd:YVO <sub>4</sub> (355, 1064)       |
|                                                    | [S75] | S.J. Moon...C. Ballif       | 2015 | IEEE J. Photovolt. | 36-72         | (355, 532)                            |
|                                                    | [S76] | B. Turan...S. Haas          | 2017 | Solar RRL          | 54*           | Nd: YVO <sub>4</sub> (355, 532, 1064) |
| <b>TCO-Based Indirect Liftoff Scribing</b>         | [S7]  | N. Rolston...R.H. Dauskardt | 2020 | Joule              | 14.4          | Nd:YVO <sub>4</sub> Fiber (1064)      |
|                                                    | [S8]  | Flick...R.H. Dauskardt      | 2024 | Adv. Energy Mater. | 180           | Nd:YVO <sub>4</sub> Fiber (1064)      |

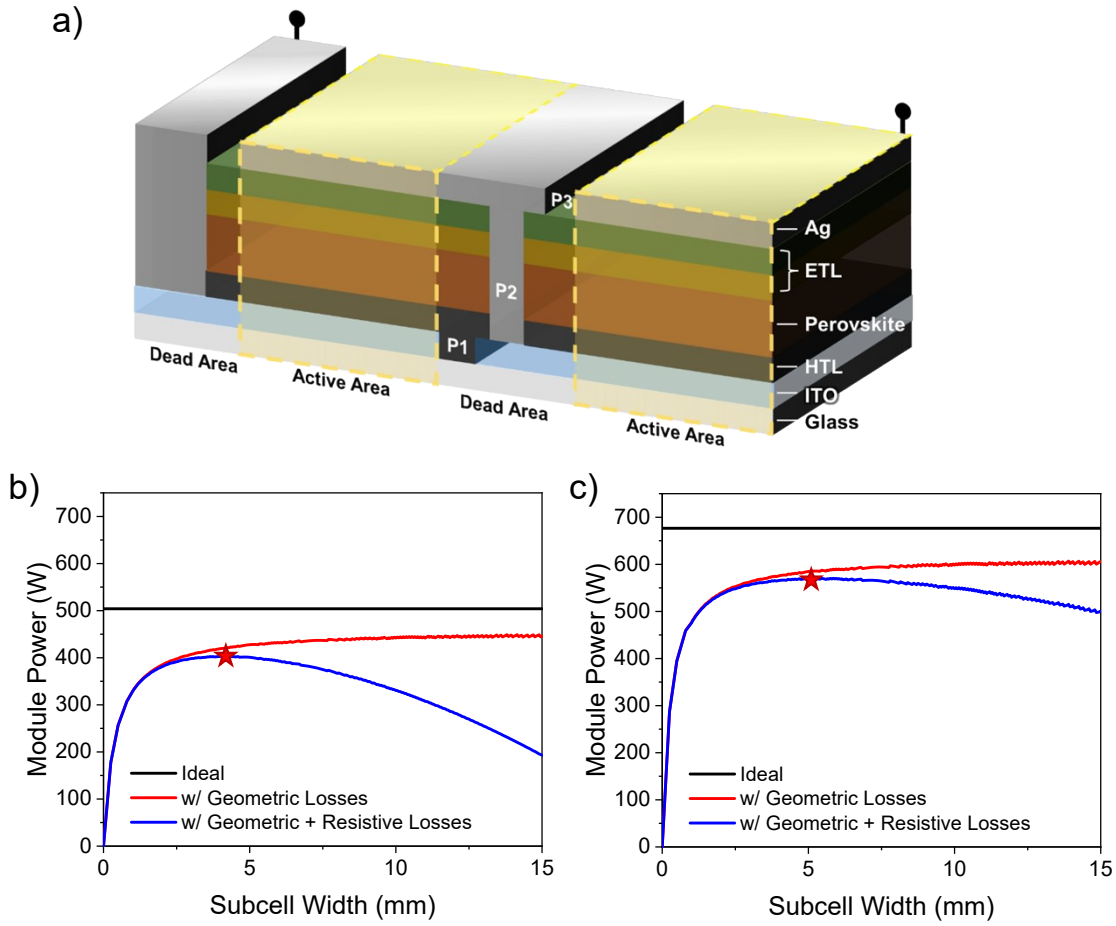

**Figure S6:** a) Thin-film serially interconnected module design used in Total Loss calculation. b) Open-air manufacturing subcell width optimization. c) Conventional manufacturing subcell width optimization.

**Table S3:** Module design and performance metrics for open-air and conventional manufacturing.

| Metric                                              | Open-Air Module | Conventional Module |
|-----------------------------------------------------|-----------------|---------------------|
| Active Area Efficiency (%)                          | 19.5            | 26.7                |
| Aperture Area Efficiency (%)                        | 17.9            | 25.3                |
| Module Area Efficiency (%)                          | 16.4            | 23.2                |
| Module Wattage                                      | 402.14          | 570.49              |
| $J_{MPP}$ , per cell ( $\text{mA}/\text{cm}^2$ )    | 19.2            | 19.98               |
| $V_{MPP}$ , per cell (V)                            | 0.80            | 0.97                |
| ITO Sheet Resistance, $R_{SH}$ ( $\Omega/\square$ ) | 35              | 10                  |
| P2 Contact Resistance, $R_C$ ( $\Omega\text{cm}$ )  | 0.32            | 1                   |
| Dead Width, $W_D$ (mm)                              | 0.4             | 0.3                 |
| Subcell Width, $W_A$ (mm)                           | 4.20            | 5.45                |
| No. of Subcells (#)                                 | 250             | 200                 |

## Module Design

$$P_{mod,real}(W_A) = P_{mod,ideal}(W_A) \times [1 - TL_R(W_A)] \quad (\text{Equation S17})$$

$$P_{mod,ideal} = N_{subcells}(W_A) \times A_{subcell}(W_A) \times 1000 W / m^2 \quad (\text{Equation S18})$$

$$A_{subcell} = [L_{mod} - 2 \times W_{ED}] \times W_A \quad (\text{Equation S19})$$

$$N_{subcells} = \frac{[W_{mod} - 2 \times W_{ED}] - W_A}{W_A + W_D}, \text{ rounded down} \quad (\text{Equation S20})$$

## Levelized Cost of Energy Calculations

Nameplate power for the utility-scale perovskite PV power plant is 100 MW. Power output for the PV systems as a function of the module array power across the 30-year system lifetime is calculated based on the solar irradiation data for Blythe, CA within SAM.

$$LCOE = \frac{-C_0 - \sum_{n=1}^N \frac{C_n}{(1+d)^n}}{\sum_{n=1}^N \frac{Q_n}{(1+d)^n}} \quad (\text{Equation S21})$$

$$N_{mod} = \frac{P_{nameplate}}{P_{mod}} \quad (\text{Equation S22})$$

$$P_1 = N_{mod} \times P_{mod} \quad (\text{Equation S23})$$

$$P_n = P_1 \times \left(1 - \frac{T80}{100}\right)^{n-1}, \text{ for } n > 1 \quad (\text{Equation S24})$$

Initial installation costs,  $C_0$ , based on the capital system costs and debt amount. Year costs  $C_n$  comprise Investment Tax Credit, state and federal taxes, principal and interest on the debt amount, reserves funding (debt, working capital, and equipment replacement), and interest on reserves.

## Module Replacement Technology Improvement

$$PCE_n = PCE_0 + 2 \times (PCE_{max} - PCE_0) \times \left( \frac{1}{1 + e^{(-EIF \times (n-1))}} - 0.5 \right) \quad (\text{Equation S25})$$

$$C_n = C_0 - (C_0 - C_{min}) \times \left(1 - e^{(1-n)/CRF}\right) \quad (\text{Equation S26})$$

Module replacement values used in this study include efficiency improvement factors (EIF) of 0.08 and cost reduction factors (CRF) of 15 (Table S5).

**Table S4:** Levelized Cost of Energy parameters fixed across all solar modules within the System Advisor Model.

| System Power Output                 |                        |                                   |                        | Cash Flow                                     |                        |                                   |                        | Earnings Before Interest, Taxes, Depreciation, and Amortization (EBITDA) |                   |
|-------------------------------------|------------------------|-----------------------------------|------------------------|-----------------------------------------------|------------------------|-----------------------------------|------------------------|--------------------------------------------------------------------------|-------------------|
| LCOE Term                           | Fixed Model Value      | LCOE Term                         | Fixed Model Value      | LCOE Term                                     | Fixed Model Value      | LCOE Term                         | Fixed Model Value      | LCOE Term                                                                | Fixed Model Value |
| Nameplate DC Capacity               | 100 MW                 | DC Losses, Module Mismatch        | 2%                     | Balance of Systems Costs, Equipment           | \$0.27/W <sub>DC</sub> | Land Costs                        | \$1000/acre            | Power Purchase Agreement Price                                           | \$0.04/kWh        |
| Maximum AC Power, Inverter          | 3600                   | DC Losses, Diodes and Connections | 0.5%                   | Balance of Systems Costs, Installation Labor  | \$0.13/W <sub>DC</sub> | Land Preparation and Transmission | \$0.02/W <sub>DC</sub> | PPA Price Escalation                                                     | 1%/year           |
| Maximum DC Voltage, Inverter        | 500                    | DC Losses, DC Wiring              | 2%                     | Balance of Systems Costs, Margin and Overhead | \$0.12/W <sub>DC</sub> | Debt Up-Front Fee                 | 2.75%                  | IRR Target Year                                                          | 25                |
| Inverter Cost                       | \$0.03/W <sub>DC</sub> | AC Losses, AC Wiring              | 1%                     | Permitting                                    | \$0.01/W <sub>DC</sub> | Debt Closing Costs                | \$450,000              | Operation and Maintenance Costs                                          | \$15/DC kW-yr     |
| DC/AC Ratio                         | 1.34                   | Soiling Losses                    | 5%                     | Engineer and Developer Overhead               | \$0.02/W <sub>DC</sub> | Tax Rate                          | 5%                     | Inflation Rate                                                           | 2.5%              |
| Ground Coverage Ratio               | 0.3                    | Nominal Discount Rate             | 9.06                   | Grid Interconnection                          | \$0.02/W <sub>DC</sub> |                                   |                        |                                                                          |                   |
| Module Technology Improvement       |                        | Equipment Replacement Reserves    |                        | Debt Amount                                   |                        | Taxes and Depreciation            |                        |                                                                          |                   |
| LCOE Term                           | Fixed Model Value      | LCOE Term                         | Fixed Model Value      | LCOE Term                                     | Fixed Model Value      | LCOE Term                         | Fixed Model Value      | LCOE Term                                                                | Fixed Model Value |
| Efficiency Improvement Factor (EIR) | 0.08                   | Equipment Replacement Cost        | \$0.10/W <sub>DC</sub> | Term Interest Rate                            | 4%                     | 5-yr MACRS Allocations            | 90%                    | Investment Tax Credit                                                    | 30%               |
| Stability Improvement Factor (SIR)  | 0.1                    | Equipment Replacement Frequency   | 15 years               | Tenure                                        | 18 years               | 15-yr MACRS Allocations           | 1.5%                   | State Tax Rate                                                           | 7%                |
| Cost Reduction Factor (CRF)         | 15                     | Reserves Interest                 | 1.25%                  | Debt Service Coverage Ratio (DSCR)            | 1.3                    | 15-yr SL Allocations              | 2.5%                   | Federal Tax Rate                                                         | 21%               |
|                                     |                        |                                   |                        |                                               |                        | 20-yr SL Allocations              | 3%                     |                                                                          |                   |

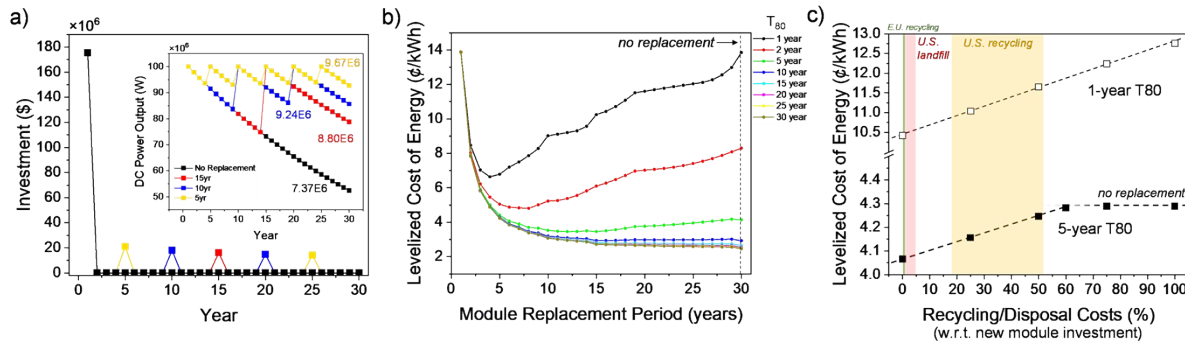

**Figure S7:** a) Module replacement with technology improvement across a 30-year PV system lifetime with an initial T<sub>80</sub> of 10 years. b) Optimization of the module replacement period in reducing LCOE for varying initial T<sub>80</sub> lifetimes. c) Module recycling rates.

**Table S5: Manufacturing costs of the open-air perovskite module assembly.**

| Open-Air Perovskite Device Processing Step | Open-Air Perovskite Manufacturing Costs at 100 MW Processing Scale (\$/m <sup>2</sup> ) |       |           |             |                       |        |
|--------------------------------------------|-----------------------------------------------------------------------------------------|-------|-----------|-------------|-----------------------|--------|
|                                            | Materials                                                                               | Labor | Utilities | Maintenance | Equipment /Facilities | Total  |
| Glass Receipt                              | 7.366                                                                                   | 0.540 | 0.103     | 0.007       | 0.029                 | 8.046  |
| ITO CORP                                   | 4.450                                                                                   | 1.005 | 0.760     | 0.613       | 2.572                 | 9.400  |
| P1 Scribe                                  | 0.000                                                                                   | 0.032 | 0.010     | 0.078       | 0.176                 | 0.296  |
| NiO <sub>x</sub> Spray Pyrolysis           | 0.068                                                                                   | 0.451 | 0.185     | 0.123       | 0.166                 | 0.993  |
| Perovskite RSPP                            | 0.734                                                                                   | 0.065 | 0.009     | 0.084       | 0.151                 | 1.042  |
| PCBM/BCP Spray Deposition                  | 5.279                                                                                   | 0.073 | 0.010     | 0.044       | 0.091                 | 5.497  |
| P2 Scribe                                  | 0.000                                                                                   | 0.080 | 0.025     | 0.079       | 0.273                 | 0.458  |
| Ag Paste Blade Coating                     | 4.259                                                                                   | 0.073 | 0.005     | 0.066       | 0.130                 | 4.533  |
| P3 Scribe                                  | 0.000                                                                                   | 0.080 | 0.024     | 0.079       | 0.273                 | 0.457  |
| P4 Edge Deletion                           | 0.000                                                                                   | 0.032 | 0.010     | 0.078       | 0.176                 | 0.296  |
| Encapsulation                              | 4.202                                                                                   | 0.599 | 0.733     | 0.139       | 0.603                 | 6.276  |
| Junction Box /Testing                      | 2.120                                                                                   | 0.567 | 0.095     | 0.019       | 0.099                 | 2.901  |
| Cleanroom                                  | 0.000                                                                                   | 0.000 | 1.41      | 0.000       | 0.301                 | 1.715  |
| Total                                      | 28.478                                                                                  | 3.598 | 3.383     | 1.409       | 5.041                 | 41.909 |

**Table S6: Manufacturing costs of the conventional perovskite module assembly.**

| Conventional Perovskite Device Processing Step | Conventional Perovskite Manufacturing Costs at 100 MW Processing Scale (\$/m <sup>2</sup> ) |        |           |             |                       |        |
|------------------------------------------------|---------------------------------------------------------------------------------------------|--------|-----------|-------------|-----------------------|--------|
|                                                | Materials                                                                                   | Labor  | Utilities | Maintenance | Equipment /Facilities | Total  |
| Glass Receipt                                  | 7.366                                                                                       | 0.764  | 0.103     | 0.010       | 0.038                 | 8.281  |
| ITO Sputter Deposition                         | 0.382                                                                                       | 2.634  | 5.176     | 1.249       | 5.984                 | 15.424 |
| P1 Scribe                                      | 0.000                                                                                       | 0.470  | 0.151     | 0.395       | 1.814                 | 2.830  |
| PTAA Blade Coating                             | 2.760                                                                                       | 0.755  | 0.032     | 0.027       | 0.149                 | 3.723  |
| Perovskite Blade Coating                       | 2.029                                                                                       | 1.510  | 0.055     | 0.056       | 0.423                 | 4.027  |
| C <sub>60</sub> /BCP Thermal Evaporation       | 4.322                                                                                       | 2.874  | 0.967     | 0.453       | 2.161                 | 10.777 |
| P2 Scribe                                      | 0.000                                                                                       | 0.470  | 0.145     | 0.395       | 1.814                 | 2.824  |
| Ag Thermal Evaporation                         | 2.830                                                                                       | 3.412  | 1.141     | 0.455       | 2.327                 | 10.165 |
| P3 Scribe                                      | 0.000                                                                                       | 1.176  | 0.353     | 0.986       | 4.482                 | 6.997  |
| P4 Edge Deletion                               | 0.000                                                                                       | 0.103  | 0.034     | 0.193       | 0.628                 | 0.958  |
| Encapsulation                                  | 4.202                                                                                       | 0.595  | 0.733     | 0.195       | 0.721                 | 6.446  |
| Junction Box /Testing                          | 2.120                                                                                       | 0.562  | 0.095     | 0.027       | 0.119                 | 2.923  |
| Cleanroom                                      | 7.366                                                                                       | 0.000  | 0.603     | 0.000       | 0.142                 | 0.745  |
| Total                                          | 26.012                                                                                      | 15.325 | 9.587     | 4.441       | 20.802                | 76.121 |

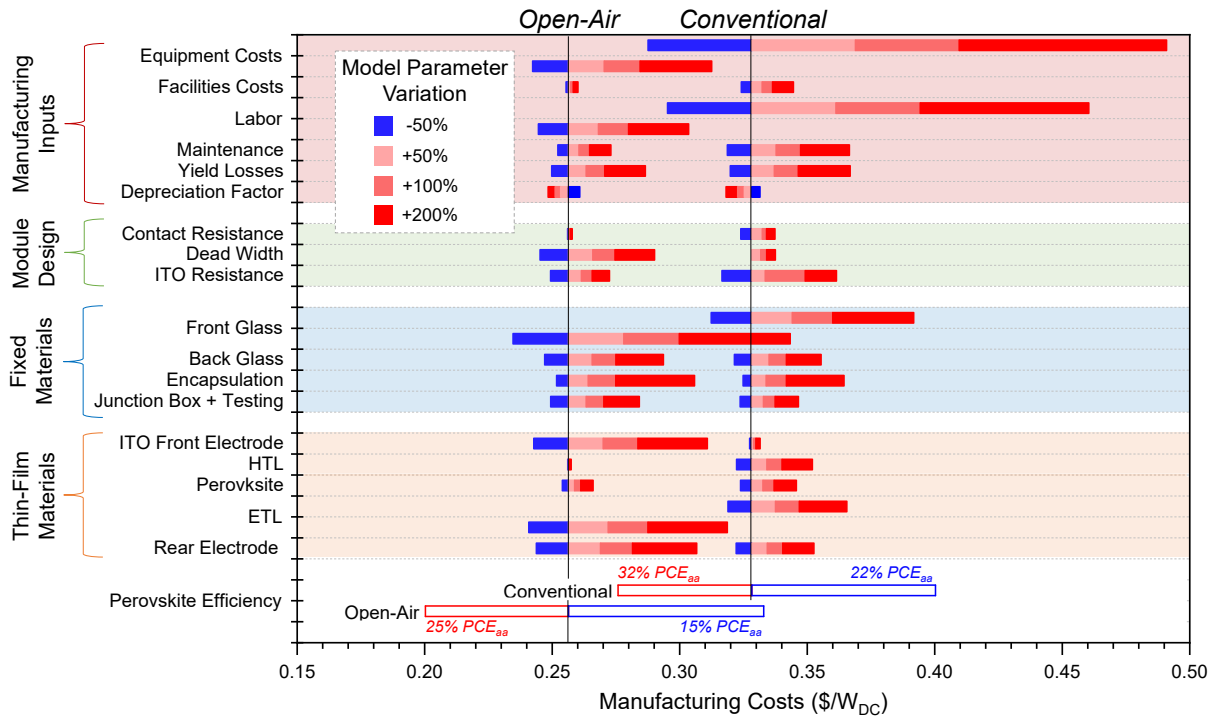

**Figure S8:** Sensitivity analysis for open-air and conventional manufacturing of perovskite solar modules. Parameters are analyzed within the cost model categories of Manufacturing Inputs, Module Design, Fixed Materials, and Thin-Film Materials. Open-air perovskite and conventional module manufacturing costs are centered around \$0.23/W<sub>DC</sub> and \$0.33/W<sub>DC</sub>, respectively.

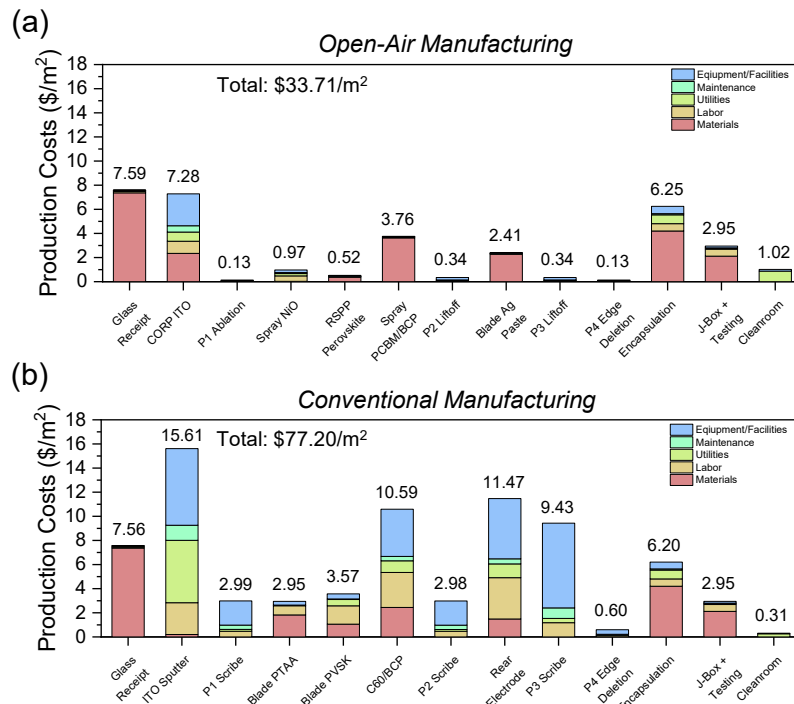

**Figure S9:** 12-step cost model at 1 GW production scale for a) open-air manufacturing and b) conventional manufacturing of perovskite solar modules.

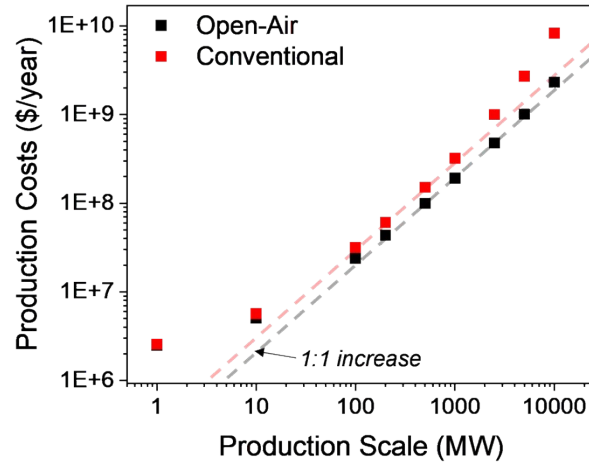

**Figure S10:** Perovskite module production costs as a function of production scale. Production scale increases that approach a 1:1 increase demonstrate economies of scale. Production scale increases that deviate from the 1:1 increase demonstrate diseconomies of scale.

**Table S7:** Minimum Sustainable Price (MSP) module costs for the perovskite, silicon, and tandem technologies across efficiencies and suppliers modeled in **Figure 5**.

| Module                    | Minimum Sustainable Price, MSP (\$/module) |           |           |
|---------------------------|--------------------------------------------|-----------|-----------|
|                           | 16%                                        | 19%       | 22%       |
| Perovskite - Open-Air     | 97.96                                      | 98.47     | 99.30     |
| Perovskite - Conventional | 241.73                                     | 233.33    | 227.61    |
|                           | <i>SE Asia</i>                             | <i>EU</i> | <i>US</i> |
| Silicon                   | 127.59                                     | 251.96    | 636.87    |
| 4T Tandem                 | 323.76                                     | 448.13    | 833.05    |
| 2T Tandem                 | 371.60                                     | 495.97    | 880.88    |

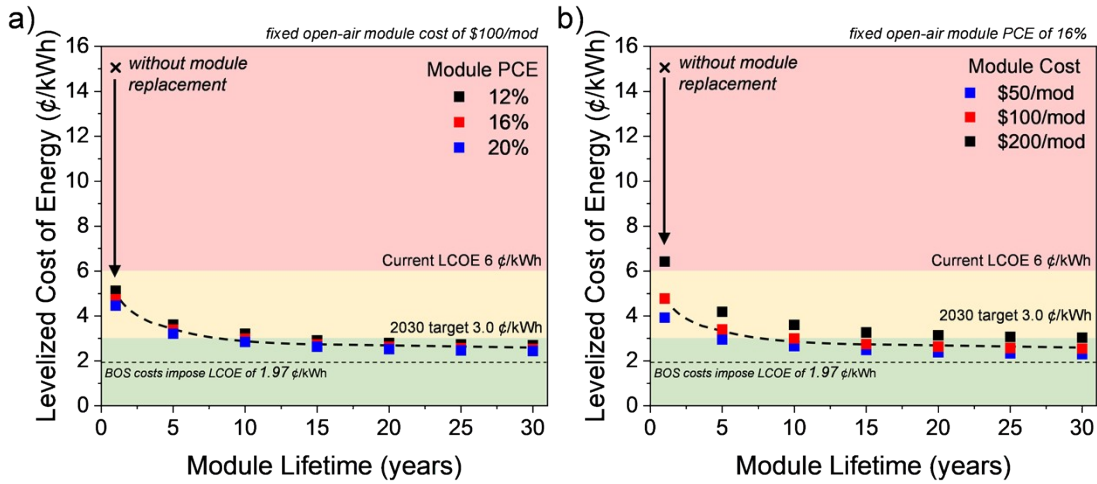

**Figure S11:** LCOE calculations for open-air module assemblies with a) variable module PCE and b) variable module manufacturing costs.

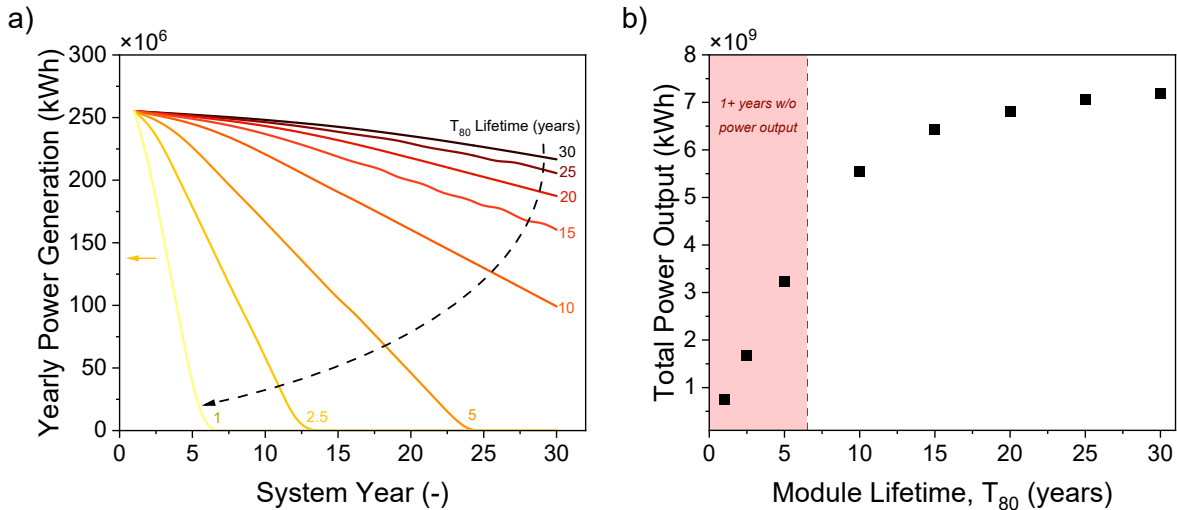

**Figure S12:** a) Yearly system power output for a 100 MW power production facility used to calculate LCOE and NPV as a function of module lifetime. b) Total system power output for the model in (a) integrated over the 30-year system lifetime. Red regime denotes <6.5-year T<sub>80</sub> lifetimes where 1+ years have zero system power output.

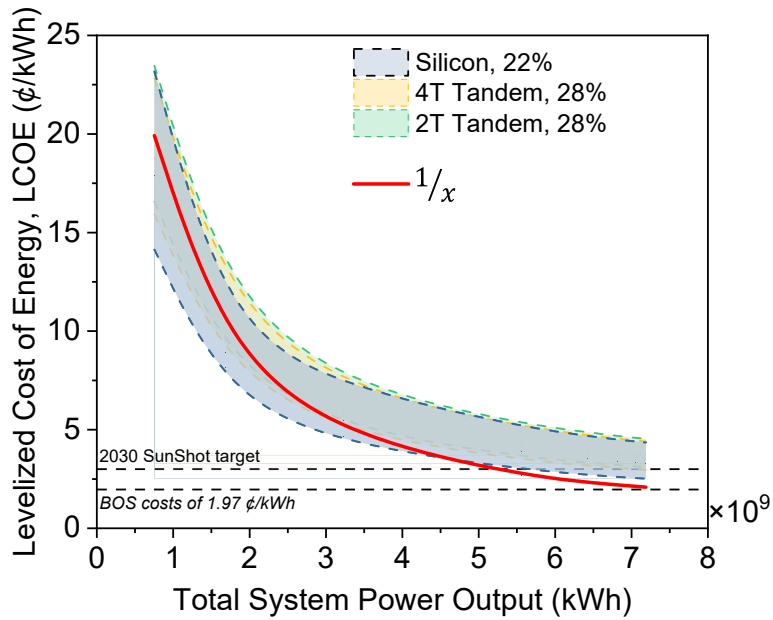

**Figure S13:** LCOE for silicon and tandem modules as a function of total system power output. Red line denotes a 1/x relationship.

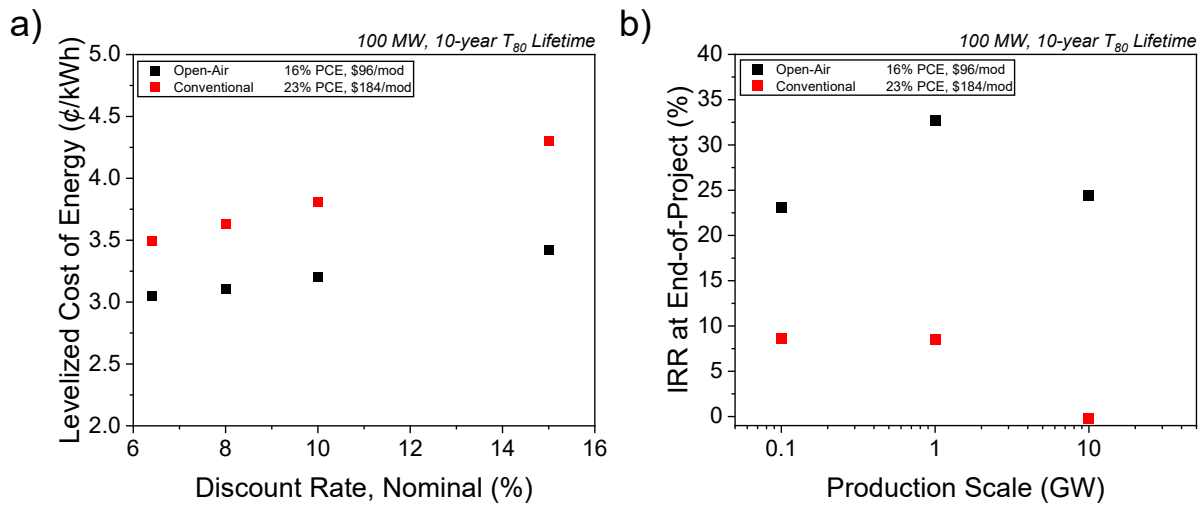

**Figure S14:** a) LCOE for the perovskite module assemblies with varying discount rates. b) Internal Rate of Return (IRR) for the perovskite module assemblies at varying production scales.

## Supplemental References

- [S1] J. Küffner, T. Wahl, M. Schultes, J. Hanisch, J. Zillner, E. Ahlswede, M. Powalla, *ACS Appl. Mater. Interfaces* **2020**, *12*, 52678.
- [S2] Z. Ouyang, M. Yang, J.B. Whitaker, D. Li, M.F.A.M. van Hest, *ACS Appl. Energy Mater.* **2020**, *3*, 3714.
- [S3] W.-Q. Wu, Z. Yang, P.N. Rudd, Y. Shao, X. Dai, H. Wei, J. Zhao, Y. Fang, Q. Wang, Y. Liu, Y. Deng, X. Xiao, Y. Feng, J. Huang, *Sci. Adv.* **2019**, *5*, eaav8925.
- [S4] C. Fei, N. Li, M. Wang, X. Wang, H. Gu, B. Chen, Z. Zhang, Z. Ni, H. Jiao, W. Xu, Z. Shi, Y. Yan, J. Huang, *Science* **2023**, *380*, 823.
- [S5] J. Küffner, J. Hanisch, T. Wahl, J. Zillner, E. Ahlswede, M. Powalla, *ACS Appl. Energy Mater.* **2021**, *4*, 11700.
- [S6] W.J. Scheideler, N. Rolston, O. Zhao, J. Zhang, R.H. Dauskardt, *Adv. Energy Mater.* **2019**, *9*, 1803600.
- [S7] N. Rolston, W.J. Scheideler, A.C. Flick, J.P. Chen, H. Elmaraghi, A. Sleugh, O. Zhao, M. Woodhouse, R.H. Dauskardt, *Joule* **2020**, *4*, 2675.
- [S8] A.C. Flick, N. Rolston, R.H. Dauskardt, *Adv. Energy Mater.* **2024**, *14*, 2303175.
- [S9] F. Hilt, M.Q. Hovish, N. Rolston, K. Brüning, C.J. Tassone, R.H. Dauskardt, *Energy Environ. Sci.* **2018**, *11*, 2102.
- [S10] F. Matteocci, L. Vesce, F.U. Kosasih, L.A. Castriotta, S. Cacovich, A.L. Palma, G. Divitini, C. Ducati, A. Di Carlo, *ACS Appl. Mater. Interfaces* **2019**, *11*, 25195.
- [S11] J. Chang, E. Feng, H. Li, Y. Ding, C. Long, Y. Gao, Y. Yang, C. Yi, Z. Zheng, J. Yang, *Nano-Micro Lett.* **2023**, *15*, 164.
- [S12] G. Tong, D.-Y. Son, L.K. Ono, Y. Liu, Y. Hu, H. Zhang, A. Jamshaid, L. Qiu, Z. Liu, Y. Qi, *Adv. Energy Mater.* **2021**, *11*, 2003712.
- [S13] Y. Deng, C.H. Van Brackle, X. Dai, J. Zhao, B. Chen, J. Huang, *Sci. Adv.* **2019**, *5*, eaax7537.
- [S14] L.A. Castriotta, F. Matteocci, L. Vesce, L. Cinà, A. Agresti, S. Pescetelli, A. Ronconi, M. Löffler, M.M. Stylianakis, F. Di Giacomo, P. Mariani, M. Stefanelli, E.M. Speller, A. Alfano, B. Paci, A. Generosi, F. Di Fonzo, A. Petrozza, B. Rellinghaus, E. Kymakis, A. Di Carlo, *ACS Appl. Mater. Interfaces* **2021**, *13*, 11741.
- [S15] S. Chen, X. Dai, S. Xu, H. Jiao, L. Zhao, J. Huang, *Science* **2021**, *373*, 902.
- [S16] F. Jafarzadeh, L.A. Castriotta, E. Calabrò, P. Spinelli, A. Generosi, B. Paci, D. Becerril Rodriguez, M. Luce, A. Cricenti, F. Di Giacomo, F. Matteocci, F. Brunetti, A. Di Carlo, *Commun. Mater.* **2024**, *5*, 186.
- [S17] A. Dubey, N. Adhikari, S. Mabrouk, F. Wu, K. Chen, S. Yang, Q. Qiao, *J. Mater. Chem. A* **2018**, *6*, 2406.
- [S18] E.A. Ramírez, J.P. Velásquez, A. Flórez, J.F. Montoya, R. Betancur, F. Jaramillo, *Adv. Eng. Mater.* **2023**, *25*, 2200964.
- [S19] A.S. Subbiah, S. Mannar, V. Hnapovskiy, A.R. Pininti, B. Vishal, L.V.T. Merino, O. Matiash, O. Karalis, H. Hempel, A. Prasetio, B. Yildirim, P. Dally, D.R. Villalva, M. Babics, L. Xu, A. Razzaq, R. Azmi, F. Xu, H.L. Bristow, E. Ugur, A.U. Rehman, H. Pasanen, E. Aydin, T. Allen, D. Baran, T. Unold, F. Laquai, S.D. Wolf, *Joule* **2025**, *9*.
- [S20] Z. Wu, E. Bi, C. Li, L. Chen, Z. Song, Y. Yan, *Sol. RRL* **2023**, *7*, 2200571.
- [S21] F. Ye, T. Tian, J. Su, R. Jiang, J. Li, C. Jin, J. Tong, S. Bai, F. Huang, P. Müller-Buschbaum, Y.-B. Cheng, T. Bu, *Adv. Energy Mater.* **2024**, *14*, 2302775.

- [S22] F. Jafarzadeh, L. Dong, D. Jang, M. Wagner, G. Koch, S. Qiu, S. Feroze, J.G. Cerrillo, C.J. Brabec, A. Di Carlo, F. Brunetti, H.-J. Egelhaaf, F. Matteocci, *Sol. RRL* **2024**, *8*, 2400530.
- [S23] Z. Yang, W. Zhang, S. Wu, H. Zhu, Z. Liu, Z. Liu, Z. Jiang, R. Chen, J. Zhou, Q. Lu, Z. Xiao, L. Shi, H. Chen, L.K. Ono, S. Zhang, Y. Zhang, Y. Qi, L. Han, W. Chen, *Sci. Adv.* **2021**, *7*, eabg3749.
- [S24] T. Bu, J. Li, H. Li, C. Tian, J. Su, G. Tong, L.K. Ono, C. Wang, Z. Lin, N. Chai, X.-L. Zhang, J. Chang, J. Lu, J. Zhong, W. Huang, Y. Qi, Y.-B. Cheng, F. Huang, *Science* **2021**, *372*, 1327.
- [S25] T. Merckx, A. Aguirre, Y. Kuang, A. van der Heide, A. Hajjiah, Y. Abdulraheem, A. Krishna, J. Poortmans, T. Aernouts, *IEEE J. Photovolt.* **2023**, *13*, 419.
- [S26] K. Xu, A. Al-Ashouri, Z.-W. Peng, E. Köhnen, H. Hempel, F. Akhundova, J.A. Marquez, P. Tockhorn, O. Shargaieva, F. Ruske, J. Zhang, J. Dagar, B. Stannowski, T. Unold, D. Abou-Ras, E. Unger, L. Korte, S. Albrecht, *ACS Energy Lett.* **2022**, *7*, 3600.
- [S28] C.-F. Li, S.-H. Huang, Y.-R. Chen, H.-C. Cha, S.-Y. Chung, Y.-H. Hsiao, F.-Y. Tsai, Y.-C. Huang, *Chem. Eng. J.* **2025**, *517*, 164194.
- [S29] C.-F. Li, H.-C. Huang, S.-H. Huang, Y.-H. Hsiao, P. Chaudhary, C.-Y. Chang, F.-Y. Tsai, W.-F. Su, Y.-C. Huang, *Nanomaterials* **2023**, *13*.
- [S30] Y. Zang, Y. Tu, C. Jiao, W. Li, P. Zhou, J. Cheng, G. Yang, T. Shao, J. Ye, G. Li, L. Chu, S. Lu, G. Liang, Y. Liang, J. Wang, Z. Zhong, R. Hu, W. Yan, *Chem. Eng. J.* **2024**, *480*, 148133.
- [S31] G. Tong, J. Zhang, T. Bu, L.K. Ono, C. Zhang, Y. Liu, C. Ding, T. Wu, S. Mariotti, S. Kazaoui, Y. Qi, *Adv. Energy Mater.* **2023**, *13*, 2300153.
- [S32] B. Abdollahi Nejang, D.B. Ritzer, H. Hu, F. Schackmar, S. Moghadamzadeh, T. Feeney, R. Singh, F. Laufer, R. Schmager, R. Azmi, M. Kaiser, T. Abzieher, S. Gharibzadeh, E. Ahlswede, U. Lemmer, B.S. Richards, U.W. Paetzold, *Nat. Energy* **2022**, *7*, 620.
- [S33] J. Li, J. Dagar, O. Shargaieva, O. Maus, M. Remec, Q. Emery, M. Khenkin, C. Ulbrich, F. Akhundova, J.A. Márquez, T. Unold, M. Fenske, C. Schultz, B. Stegemann, A. Al-Ashouri, S. Albrecht, A.T. Esteves, L. Korte, H. Köbler, A. Abate, D.M. Többens, I. Zizak, E.J.W. List-Kratochvil, R. Schlatmann, E. Unger, *Adv. Energy Mater.* **2023**, *13*, 2203898.
- [S34] J.E. Bishop, C.D. Read, J.A. Smith, T.J. Routledge, D.G. Lidzey, *Sci. Rep.* **2020**, *10*, 6610.
- [S35] J. Su, X. Zheng, H. Guo, S. Jiang, H. Tian, J. Yang, X. Ye, H. Cai, J. Ni, J. Qiu, J. Zhang, *J. Electron. Mater.* **2022**, *51*, 2396.
- [S36] J.H. Heo, F. Zhang, C. Xiao, S.J. Heo, J.K. Park, J.J. Berry, K. Zhu, S.H. Im, *Joule* **2021**, *5*.
- [S37] E.J. Cassella, E.L.K. Spooner, T. Thornber, M.E. O’Kane, T.E. Catley, J.E. Bishop, J.A. Smith, O.S. Game, D.G. Lidzey, *Adv. Sci.* **2022**, *9*, 2104848.
- [S38] B. Tyagi, N. Kumar, H.B. Lee, M.M. Ovhal, V.V. Satale, A. Mohamed, D.-H. Kim, J.-W. Kang, *Small Methods* **2024**, *8*, 2300237.
- [S39] T. Thornber, O.S. Game, E.J. Cassella, M.E. O’Kane, J.E. Bishop, T.J. Routledge, T.I. Alanazi, M. Togay, P.J.M. Isherwood, L.C. Infante-Ortega, D.B. Hammond, J.M. Walls, D.G. Lidzey, *ACS Appl. Mater. Interfaces* **2022**, *14*, 37587.
- [S40] E.J. Cassella, T. Thornber, R.D.J. Oliver, M.E. O’Kane, E.L.K. Spooner, R.C. Kilbride, T.E. Catley, O.S. Game, A.J. Ramadan, D.G. Lidzey, *Sol. RRL* **2024**, *8*, 2300814.

- [S41] H. Li, J. Zhou, L. Tan, M. Li, C. Jiang, S. Wang, X. Zhao, Y. Liu, Y. Zhang, Y. Ye, W. Tress, C. Yi, *Sci. Adv.* **2022**, *8*, eabo7422.
- [S42] J. Li, H. Wang, X.Y. Chin, H.A. Dewi, K. Vergeer, T.W. Goh, J.W.M. Lim, J.H. Lew, K.P. Loh, C. Soci, T.C. Sum, H.J. Bolink, N. Mathews, S. Mhaisalkar, A. Bruno, *Joule* **2020**.
- [S43] Y. Xu, K. Xu, T. Pan, X. Ke, Y. Li, N. Meng, X. Shi, J. Liu, Y. Cui, Z. Wang, X. Min, Y. Lv, L. Chao, Z. Hu, Q. Guo, Y. Xia, Y. Chen, W. Huang, *Nat. Photonics* **2025**, *19*, 1345.
- [S44] F.U. Kosasih, E. Erdenebileg, N. Mathews, S.G. Mhaisalkar, A. Bruno, *Joule* **2022**, *6*, 2692.
- [S45] Y.-H. Chiang, K. Frohna, H. Salway, A. Abfalterer, L. Pan, B. Roose, M. Anaya, S.D. Stranks, *ACS Energy Lett.* **2023**, *8*, 2728.
- [S46] T. Abzieher, D.T. Moore, M. Roß, S. Albrecht, J. Silvia, H. Tan, Q. Jeangros, C. Ballif, M.T. Hoerantner, B.-S. Kim, H.J. Bolink, P. Pistor, J.C. Goldschmidt, Y.-H. Chiang, S.D. Stranks, J. Borchert, M.D. McGehee, M. Morales-Masis, J.B. Patel, A. Bruno, U.W. Paetzold, *Energy Environ. Sci.* **2024**, *17*, 1645.
- [S47] A. Paliwal, K.P.S. Zanoni, C. Roldán-Carmona, N. Rodkey, H.J. Bolink, *ACS Energy Lett.* **2024**, *9*, 4587.
- [S48] J.-H. Lee, B.S. Kim, J. Park, J.-W. Lee, K. Kim, *Adv. Mater. Technol.* **2023**, *8*, 2200928.
- [S49] V.S. Nguyen, I. Zimmermann, E. Grépin, K. Medjoubi, S. Jutteau, F. Donsanti, E. Bruhat, A. Duchatelet, S. Berson, J. Rousset, *Mater. Sci. Semicond. Process.* **2023**, *158*, 107358.
- [S50] F. Sahli, J. Werner, B.A. Kamino, M. Bräuningner, R. Monnard, B. Paviet-Salomon, L. Barraud, L. Ding, J.J. Diaz Leon, D. Sacchetto, G. Cattaneo, M. Despeisse, M. Boccard, S. Nicolay, Q. Jeangros, B. Niesen, C. Ballif, *Nat. Mater.* **2018**, *17*, 820.
- [S51] A.Z. Afshord, B.E. Uzuner, W. Soltanpoor, S.H. Sedani, T. Aernouts, G. Gunbas, Y. Kuang, S. Yerci, *Adv. Funct. Mater.* **2023**, *33*, 2301695.
- [S52] W. Soltanpoor, C. Dressen, M.C. Sahiner, I. Susic, A.Z. Afshord, V.S. Chirvony, P.P. Boix, G. Gunbas, S. Yerci, H.J. Bolink, *ACS Appl. Energy Mater.* **2020**, *3*, 8257.
- [S53] L. Tan, J. Zhou, X. Zhao, S. Wang, M. Li, C. Jiang, H. Li, Y. Zhang, Y. Ye, W. Tress, L. Ding, M. Grätzel, C. Yi, *Adv. Mater.* **2023**, *35*, 2205027.
- [S54] C. Chen, J. Chen, H. Han, L. Chao, J. Hu, T. Niu, H. Dong, S. Yang, Y. Xia, Y. Chen, W. Huang, *Nature* **2022**, *612*, 266.
- [S55] F. Schackmar, H. Eggers, M. Frericks, B.S. Richards, U. Lemmer, G. Hernandez-Sosa, U.W. Paetzold, *Adv. Mater. Technol.* **2021**, *6*, 2000271.
- [S56] N. Srisamran, J. Sudchanham, C. Sriprachuabwong, K. Srisawad, P. Pakawatpanurut, K. Lohawet, P. Kumnorkaew, T. Krajangsang, A. Tuantranont, *Energy Fuels* **2023**, *37*, 6049.
- [S57] H. Li, C. Zuo, D. Angmo, H. Weerasinghe, M. Gao, J. Yang, *Nano-Micro Lett.* **2022**, *14*, 79.
- [S58] B. Gao, J. Meng, *Sol. Energy* **2021**, *230*, 598.
- [S59] D.A. Chalkias, A. Mourtzikou, G. Katsagounos, A.N. Kalarakis, E. Stathatos, *Small Methods* **2023**, *7*, 2300664.
- [S60] J.-Y. Jeng, Y.-F. Chiang, M.-H. Lee, S.-R. Peng, T.-F. Guo, P. Chen, T.-C. Wen, *Adv. Mater.* **2013**, *25*, 3727.
- [S61] W. Chen, Y. Wu, Y. Yue, J. Liu, W. Zhang, X. Yang, H. Chen, E. Bi, I. Ashraful, M. Grätzel, L. Han, *Science* **2015**, *350*, 944.
- [S62] J. Li, C. Kuang, M. Zhao, C. Zhao, L. Liu, F. Lu, N. Wang, C. Huang, C. Duan, H. Jian, L. Yao, T. Jiu, *Inorg. Chem.* **2018**, *57*, 8375.

- [S63] M. Zhang, Q. Chen, R. Xue, Y. Zhan, C. Wang, J. Lai, J. Yang, H. Lin, J. Yao, Y. Li, L. Chen, Y. Li, *Nat. Commun.* **2019**, *10*, 4593.
- [S64] J. Cao, B. Wu, J. Peng, X. Feng, C. Li, Y. Tang, *Sci. China Chem.* **2019**, *62*, 363.
- [S65] J. Troughton, M. Neophytou, N. Gasparini, A. Seitkhan, F. H. Isikgor, X. Song, Y.-H. Lin, T. Liu, H. Faber, E. Yengel, J. Kosco, M. F. Oszejca, B. Hartmeier, M. Rossier, N. A. Lüchinger, L. Tsetseris, H. J. Snaith, S.D. Wolf, T. D. Anthopoulos, I. McCulloch, D. Baran, *Energy Environ. Sci.* **2020**, *13*, 268.
- [S66] D.S. Mann, P. Patil, D.-H. Kim, S.-N. Kwon, S.-I. Na, *J. Power Sources* **2020**, *477*, 228738.
- [S67] Z. Huang, X. Hu, Z. Zhao, X. Meng, M. Su, T. Xue, J. Chi, H. Xie, Z. Cai, Y. Chen, L. Li, Y. Song, *Adv. Energy Mater.* **2021**, *11*, 2101291.
- [S68] Y. Gao, C. Liu, M. He, C. Zhang, L. Liu, Q. Luo, Y. Wu, H. Zhang, X. Zhong, R. Guo, Y. Xie, S. Wu, R.E.I. Schropp, Y. Mai, *Adv. Mater.* **2024**, *36*, 2309310.
- [S69] N. Rolston, A. Sleugh, J.P. Chen, O. Zhao, T.W. Colburn, A.C. Flick, R.H. Dauskardt, *Front. Energy Res.* **2021**, *9*.
- [S70] G. Mincuzzi, A.L. Palma, A. Di Carlo, T.M. Brown, *ChemElectroChem* **2016**, *3*, 9.
- [S71] H. Chen, F. Ye, W. Tang, J. He, M. Yin, Y. Wang, F. Xie, E. Bi, X. Yang, M. Grätzel, L. Han, *Nature* **2017**, *550*, 92.
- [S72] E. Bi, W. Tang, H. Chen, Y. Wang, J. Barbaud, T. Wu, W. Kong, P. Tu, H. Zhu, X. Zeng, J. He, S. Kan, X. Yang, M. Grätzel, L. Han, *Joule* **2019**, *3*, 2748.
- [S73] F. Di Giacomo, L.A. Castriotta, F.U. Kosasih, D. Di Girolamo, C. Ducati, A. Di Carlo, *Micromachines* **2020**, *11*, 1127.
- [S74] A.L. Palma, F. Matteocci, A. Agresti, S. Pescetelli, E. Calabrò, L. Vesce, S. Christiansen, M. Schmidt, A.D. Carlo, *IEEE J. Photovolt.* **2017**, *7*, 1674.
- [S75] S.J. Moon, J.H. Yum, L. Löfgren, A. Walter, L. Sansonnens, M. Benkhaira, S. Nicolay, J. Bailat, C. Ballif, *IEEE J. Photovolt.* **2015**, *5*, 1087.
- [S76] B. Turan, A. Huuskonen, I. Kühn, T. Kirchartz, S. Haas, *Sol. RRL* **2017**, *1*, 1700003.
